# Supplementary material for: A tough fluorescent nanocomposite hydrogel probe based on graphene quantum dots for the selective detection of Fe3+ ions
Source: Royal Society of Chemistry journal article supplement (doi:10.1039/d2ma00605g), 2022-01-01
Supplement: d2ma00605g1.pdf [file d2ma00605g1.pdf]

ARTICLE

## Electronic Supplementary Information (ESI)

### **Tough fluorescent nanocomposite hydrogel probe based on graphene quantum dots for selective detections Fe<sup>3+</sup> ions**

Juan Du,\* Wenli Zhu, Xiaohong She, Qiyu Yu, Qiaoling Yang, Huiping Huang, Chihui Tsou, and De Guzman  
Manuel

Material Corrosion and Protection Key Laboratory of Sichuan Province, College of Materials Science and  
Engineering, Sichuan University of Science and Engineering, Zigong 643000, China.

Corresponding Author:

E-mail: dujuan@suse.edu.cn.

## Supplementary Figures

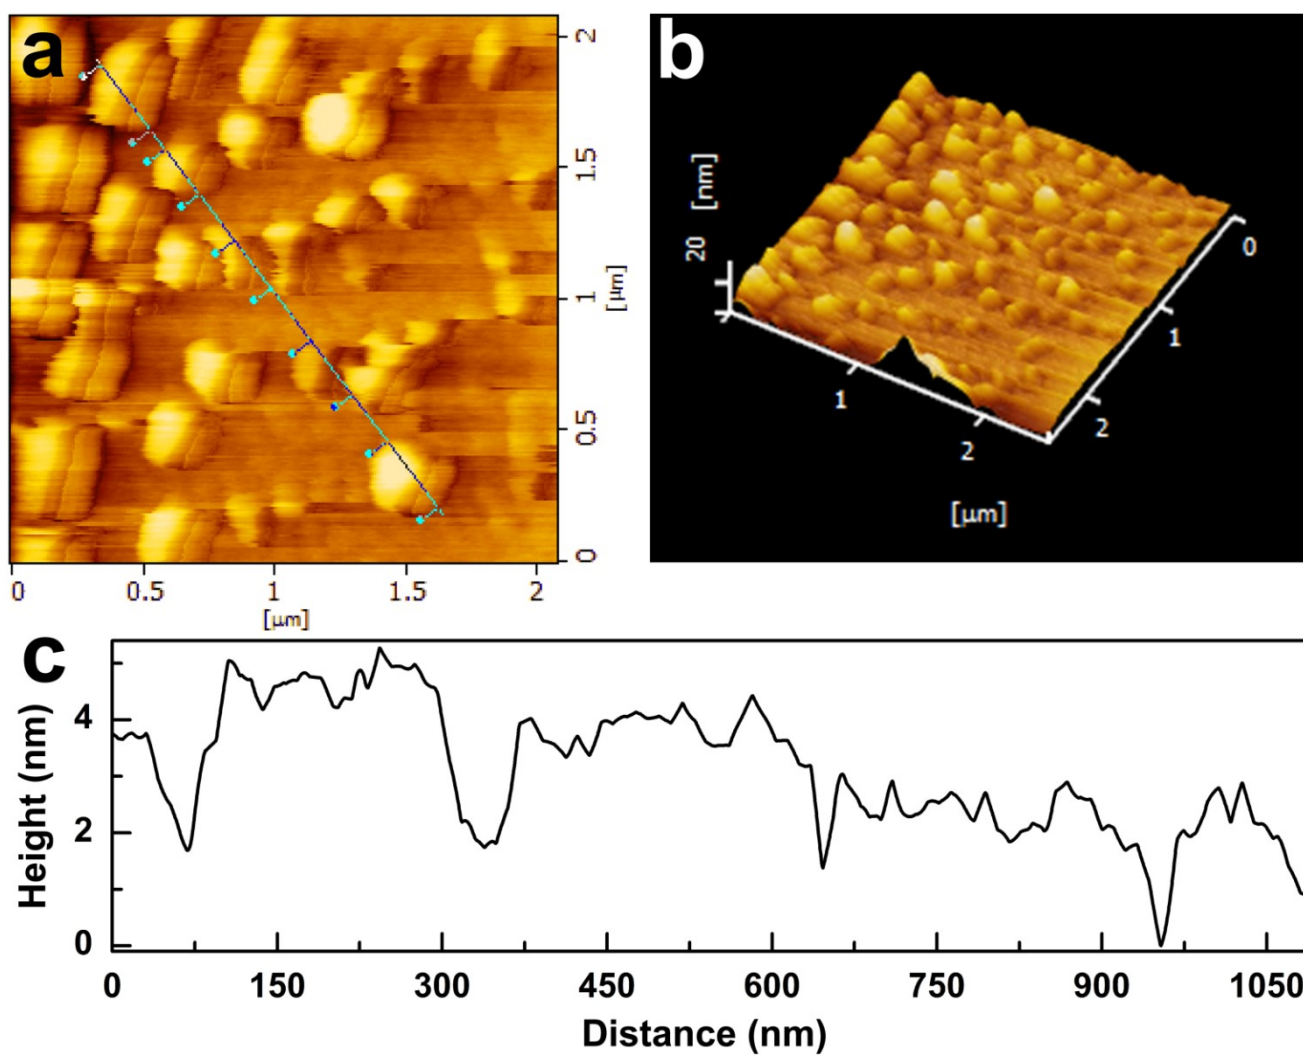

Fig. S1 Atomic force microscopy images (a), 3D topographic map (b) and the height distributions (c) of the synthesized GQDs.

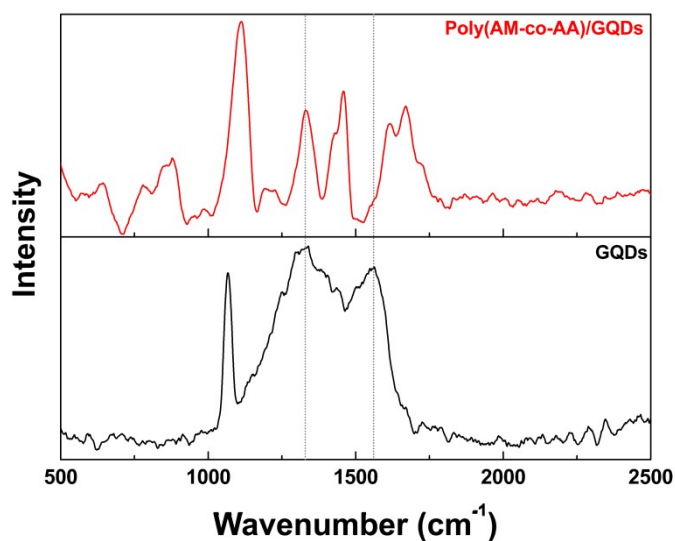

Fig. S2 Raman spectra of GQDs and poly(AM-co-AA)/GQDs nanocomposite hydrogel (1 wt% GQDs).
